# Supplementary material for: Diet-Related Alterations of Gut Bile Salt Hydrolases Determined Using a Metagenomic Analysis of the Human Microbiome
Source: MDPI journal article supplement (doi:10.3390/ijms22073652), 2021-04-01
Supplement: s1 [file s1]

**Supplementary Table S1** Experimentally characterized bile salt hydrolases from literature.

| Entry      | Organism                                 | Length | Cluster     | References |
|------------|------------------------------------------|--------|-------------|------------|
| A0A3A6KI09 | <i>Bacteroides sp.</i> AF35-22           | 351    | Cluster1(S) | [11]       |
| Q8A600     | <i>Bacteroides thetaiotaomicron</i>      | 352    | Cluster1(S) | [38]       |
| Q1WR93     | <i>Lactobacillus salivarius</i>          | 316    | Cluster2    | [48]       |
| C7AQX8     | <i>Lactobacillus salivarius</i>          | 324    | Cluster2    | [48]       |
| C7AQY2     | <i>Lactobacillus salivarius</i>          | 324    | Cluster2    | [49]       |
| C7AQX9     | <i>Lactobacillus salivarius</i>          | 325    | Cluster2    | [49]       |
| J7H3P9     | <i>Lactobacillus salivarius</i>          | 324    | Cluster2    | [50]       |
| A0A0R2G1E1 | <i>Lactobacillus plantarum</i>           | 324    | Cluster2    | [51]       |
| Q06115     | <i>Lactobacillus plantarum</i>           | 324    | Cluster2    | [52]       |
| M1R991     | <i>Lactobacillus plantarum</i>           | 328    | Cluster2    | [53]       |
| B9V405     | <i>Lactobacillus gasseri</i>             | 325    | Cluster2    | [54]       |
| A0A1Y0E209 | <i>Lactobacillus gasseri</i>             | 326    | Cluster2    | [55]       |
| Q5FKM3     | <i>Lactobacillus acidophilus</i>         | 325    | Cluster2    | [56]       |
| Q5FK51     | <i>Lactobacillus acidophilus</i>         | 325    | Cluster2    | [56]       |
| A5VJH0     | <i>Lactobacillus reuteri</i>             | 325    | Cluster2    | [57]       |
| A0A1B3PS02 | <i>Lactobacillus johnsonii</i>           | 326    | Cluster2    | [58]       |
| A5HKP3     | <i>Lactobacillus acidophilus</i>         | 316    | Cluster2    | [58]       |
| A0A2M9NK78 | <i>Lactobacillus johnsonii</i>           | 325    | Cluster2    | [58]       |
| Q9F660     | <i>Lactobacillus johnsonii</i>           | 326    | Cluster2    | [59]       |
| P97038     | <i>Lactobacillus johnsonii</i>           | 316    | Cluster2    | [59]       |
| Q9KK62     | <i>Bifidobacterium longum</i>            | 317    | Cluster2    | [60]       |
| A0A087BL81 | <i>Bifidobacterium longum</i>            | 317    | Cluster2    | [61]       |
| Q6R974     | <i>Bifidobacterium bifidum</i>           | 316    | Cluster2    | [62]       |
| G0YYC2     | <i>Bifidobacterium animalis</i>          | 314    | Cluster2    | [63]       |
| Q53CP8     | <i>Bifidobacterium animalis</i>          | 314    | Cluster2    | [64]       |
| A0A072MTF9 | <i>Bifidobacterium pseudocatenulatum</i> | 316    | Cluster2    | [61]       |
| P54965     | <i>Clostridium perfringens</i>           | 329    | Cluster2    | [65]       |
| C7CXJ5     | <i>Enterococcus faecalis</i> T2          | 324    | Cluster2    | [66]       |
| R6GBZ3     | <i>Eubacterium hallii</i> CAG:12         | 324    | Cluster2    | [11]       |
| A0A380KNN4 | <i>Streptococcus infantarius</i>         | 325    | Cluster2    | [11]       |
| D6DDI0     | <i>Bifidobacterium longum</i>            | 334    | Cluster2    | [11]       |
| A5ZA20     | <i>Eubacterium ventriosum</i> ATCC 27560 | 329    | Cluster2    | [12]       |
| A5ZWR0     | <i>Blautia obeum</i> ATCC 29174          | 325    | Cluster2    | [12]       |
| A5ZM11     | <i>Blautia obeum</i> ATCC 29174          | 326    | Cluster2    | [12]       |

|            |                                           |     |             |      |
|------------|-------------------------------------------|-----|-------------|------|
| A4E835     | <i>Collinsella aerofaciens</i> ATCC 25986 | 308 | Cluster2    | [12] |
| A7A5K1     | <i>Bifidobacterium adolescentis</i> L2-32 | 347 | Cluster2    | [12] |
| A0A3A6KGT7 | <i>Bacteroides sp.</i> AF35-22            | 361 | Cluster3(S) | [11] |
| A7LYY3     | <i>Bacteroides ovatus</i>                 | 359 | Cluster3(S) | [12] |
| A7V5S3     | <i>Bacteroides uniformis</i>              | 361 | Cluster3(S) | [12] |
| A0A416F798 | <i>Clostridium sp.</i> AF32-7AC           | 336 | Cluster4    | [11] |
| H6WSA2     | <i>Lactobacillus fermentum</i>            | 325 | Cluster5    | [67] |
| M1R367     | <i>Lactobacillus plantarum</i>            | 317 | Cluster6    | [53] |
| A0A1F0S498 | <i>Lactobacillus sp.</i> HMSC056D05       | 338 | Cluster7    | [68] |
| E2YQS1     | <i>Enterococcus faecalis</i> DAPTO 512    | 355 | Cluster7    | [11] |

**Supplementary Fig. S1**

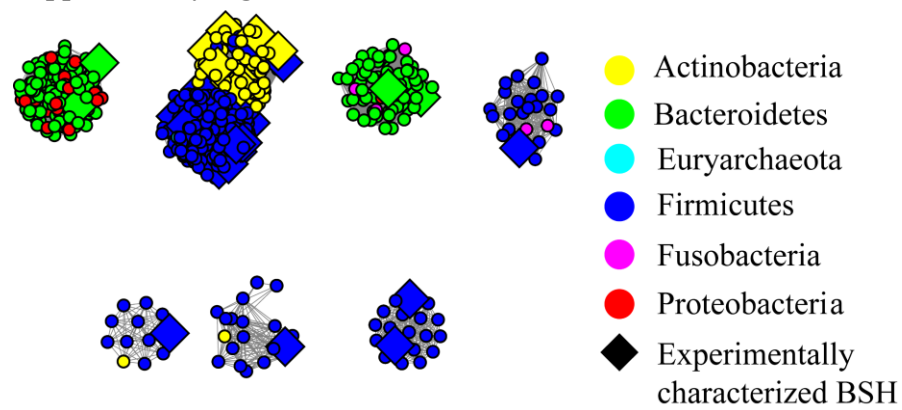

**Supplementary Fig. S1** Protein sequence similarity network (SSN) of bile salt hydrolases from the human gut. The proteins listed in Supplementary dataset were used generate the network using an e-value threshold of  $10^{-60}$  ( $>40\%$  sequence identity). A representative node from each cluster listed in Supplementary Table S1 is enlarged. Nodes from the same phylum are represented by the same color as presented in the right part.

**Supplementary Fig. S2**

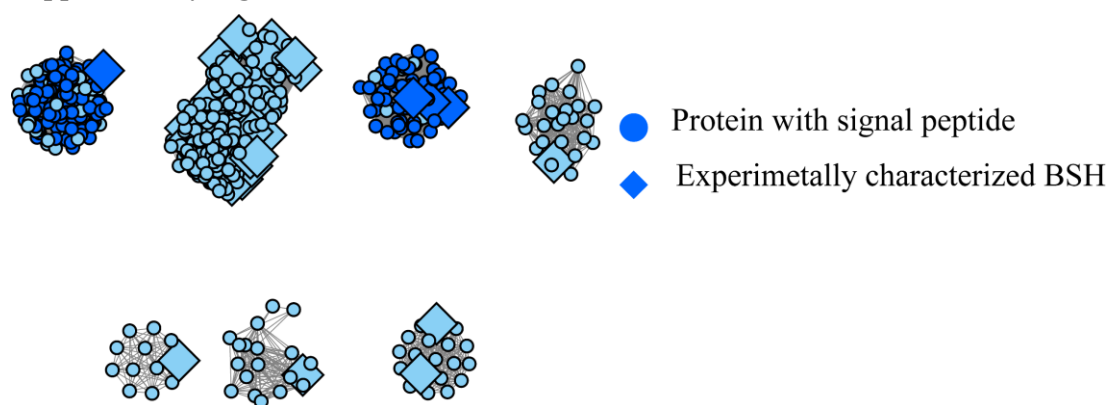

**Supplementary Figure S2.** Protein sequence similarity network (SSN) of bile salt hydrolases (BSHs) annotated by signal peptides. The proteins with signal peptides are shown in deep blue.

### Supplementary Fig. S3

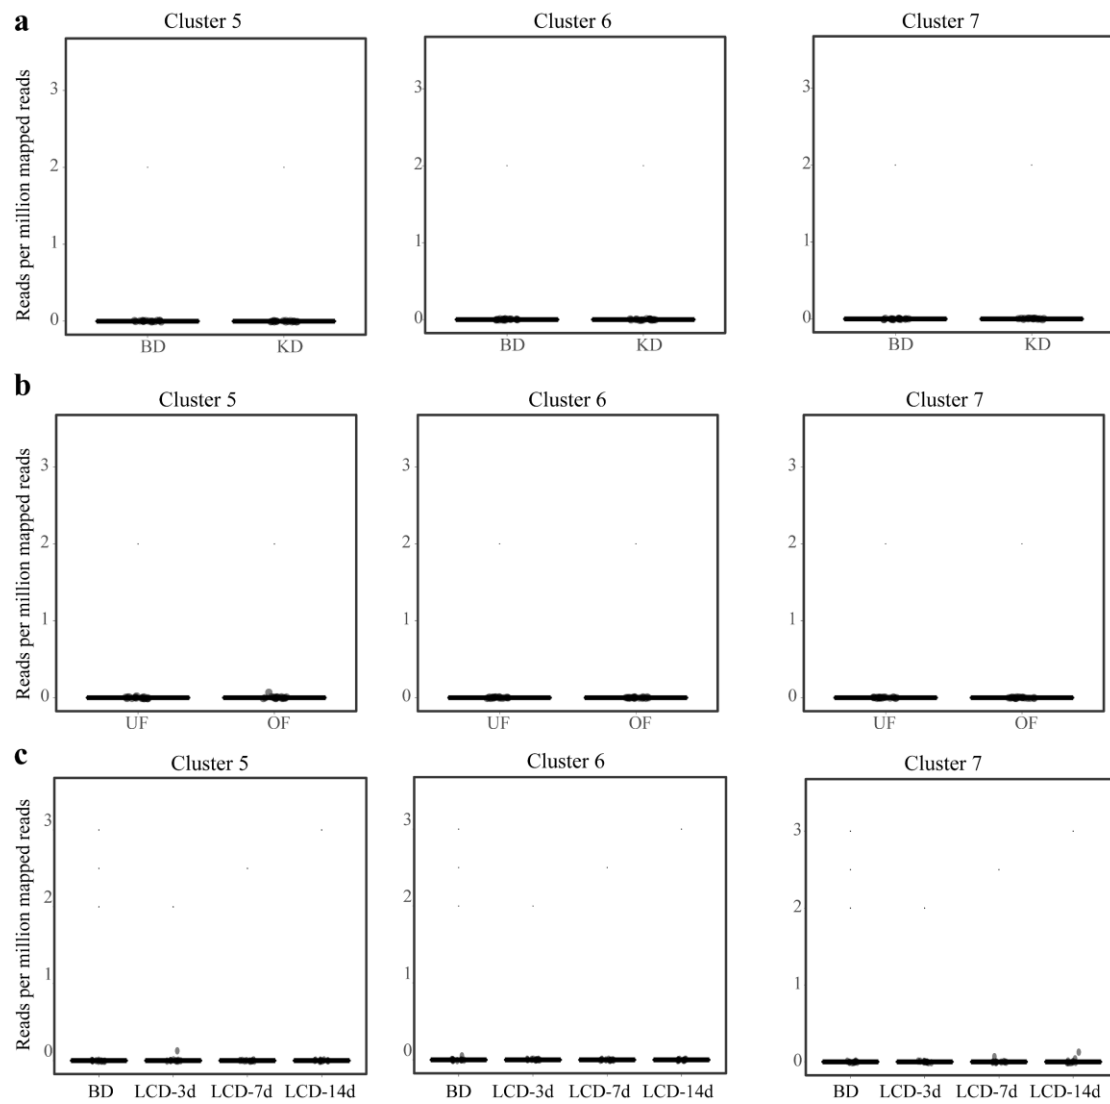

**Supplementary Figure S3.** The abundance of the BSH of Cluster 5-7 from the datasets of the BD versus KD cohort (b), UFD versus OFD cohort (c), and the BD versus LCD cohort (d) were further compared.

**Supplementary Fig. S4**

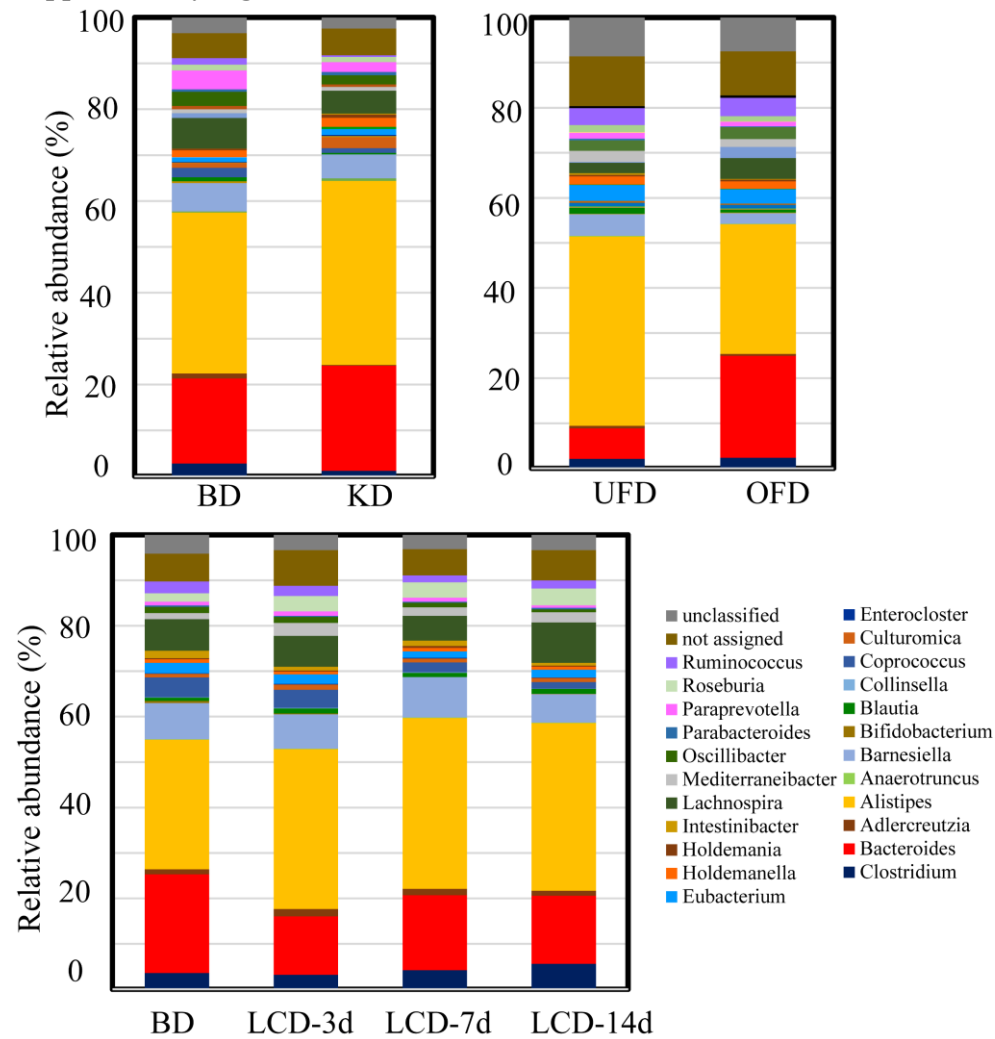

**Supplementary Fig. S4** Taxonomic distribution of BSH-active bacteria at the genus level in subjects of the baseline diet (BD) and ketogenic diet (KD), underfeeding diet (UFD) and overfeeding diet (OFD), and BD and low-carbohydrate diet (LCD) after 3, 7, and 14 days (LCD-3d, LCD-7d, and LCD-14d).
